# Supplementary material for: Synthesis and crystal structure of a novel copper(ii) complex of curcumin-type and its application in in vitro and in vivo imaging
Source: Royal Society of Chemistry journal article supplement (doi:10.1039/c4tb00133h), 2014-01-01
Supplement: c4tb00133h1.pdf [file c4tb00133h1.pdf]

## Supporting Information for the manuscript

### Synthesis and Crystal Structure of Copper(II) Complex of Curcumin-type and Application for in Vivo Early Tumor Imaging

Guoyong Xu<sup>a</sup>, Jiafeng Wang<sup>b</sup>, Tao Liu<sup>b</sup>, Mahong Wang<sup>a</sup>,  
Shuangsheng \*Zhou<sup>abc</sup>, Baoxing Wu<sup>bc</sup>, Minghua Jiang<sup>c</sup>

<sup>a</sup>Center of Modern Experimental Technology, Anhui University, Hefei 230039, P. R.China

<sup>b</sup>Department of Pharmacy, Anhui College of Chinese Medicine, Hefei 230038, PR China

<sup>c</sup>State Key Laboratory of Crystal Materials, Shandong University, Jinan 502100, PR China

|                                                                                                                                                                                                                                                                                                                            |    |
|----------------------------------------------------------------------------------------------------------------------------------------------------------------------------------------------------------------------------------------------------------------------------------------------------------------------------|----|
| <b>Part 1.</b> Structure Characterizations of the compounds                                                                                                                                                                                                                                                                | 2  |
| <b>Fig. S1.</b> MS spectra of HL                                                                                                                                                                                                                                                                                           | 2  |
| <b>Fig. S2.</b> Crystal Structure Determination of HL                                                                                                                                                                                                                                                                      | 3  |
| <b>Fig. S3.</b> (a) The ORTEP structure of $\text{CuL}_2 \cdot \text{C}_4\text{H}_8\text{O}_2$ (50% thermal ellipsoid probability).<br>(b) View showing the 1D columnar arrangement stabilized by $\pi$ - $\pi$ interactions of Cu(II)<br>Complex. (c) View showing the 3D supramolecular structure of the Cu(II) Complex. | 4  |
| <b>Table S1.</b> Crystal data and structure refinement parameters for HL and $\text{CuL}_2 \cdot \text{C}_4\text{H}_8\text{O}_2$                                                                                                                                                                                           | 6  |
| <b>Table S2.</b> Selected bond lengths [ $\text{\AA}$ ] and angles [ $^\circ$ ] for HL                                                                                                                                                                                                                                     | 7  |
| <b>Table S3.</b> Selected bond lengths [ $\text{\AA}$ ] and angles [ $^\circ$ ] for $\text{CuL}_2 \cdot \text{C}_4\text{H}_8\text{O}_2$                                                                                                                                                                                    | 8  |
| <b>Part 3</b>                                                                                                                                                                                                                                                                                                              | 9  |
| <b>Fig. S4.</b> Linear absorption spectra of HL and $\text{CuL}_2 \cdot \text{C}_4\text{H}_8\text{O}_2$ in several solvents<br>with differing Polarity.                                                                                                                                                                    | 9  |
| <b>Fig. S5.</b> SPEF spectra of HL and $\text{CuL}_2 \cdot \text{C}_4\text{H}_8\text{O}_2$ in several solvents with differing<br>Polarity.                                                                                                                                                                                 | 10 |
| <b>Fig. S6</b> cytotoxicity data results of obtained compounds against MCF-7 cell line                                                                                                                                                                                                                                     | 11 |

### Part 1 Structure Characterizations of the compounds

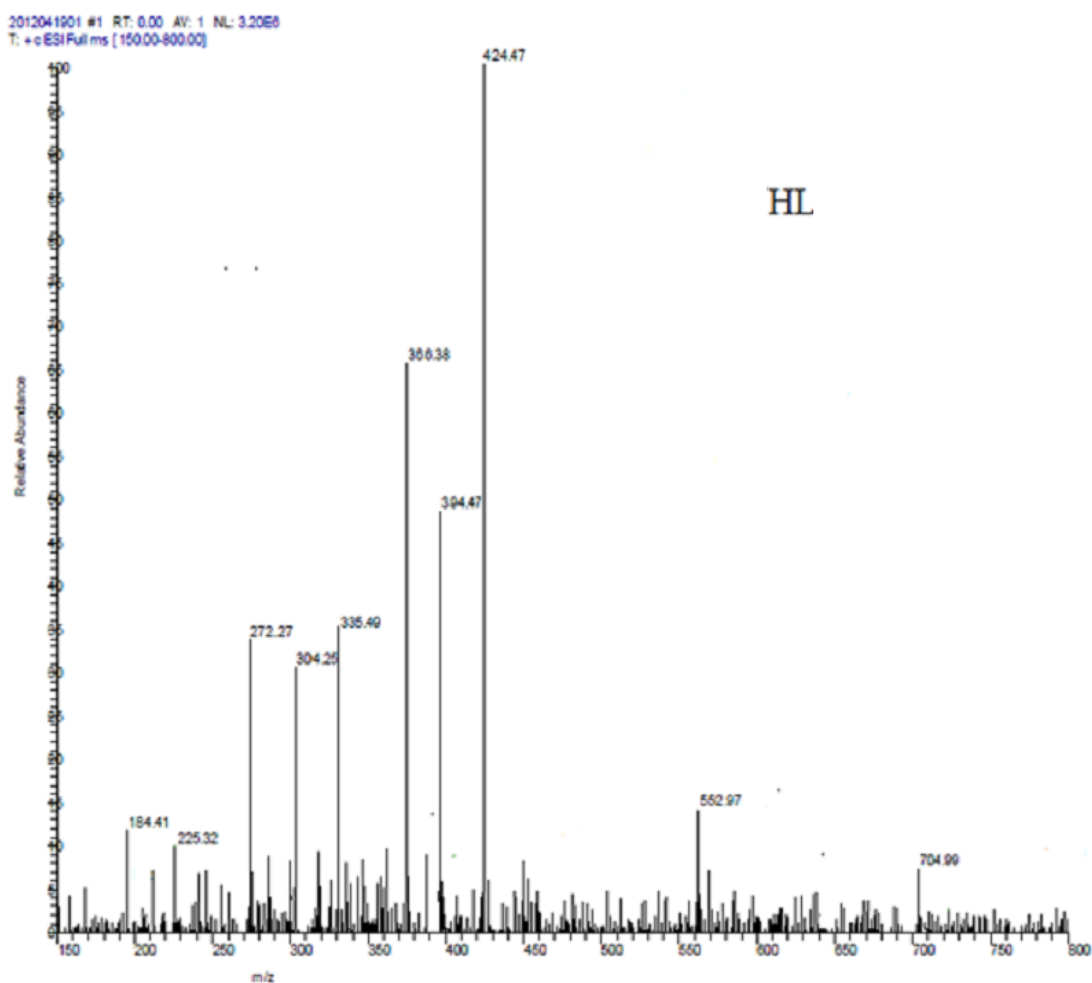

**Fig.S1.** MS spectra of HL

**Crystal Structure Determinations:** The molecular structures of HL and  $\text{CuL}_2 \cdot \text{C}_4\text{H}_8\text{O}_2$  were shown in Fig. S2-S3. The unit cell, data collection and refinement parameters are located in the following Table S1, Tables S2 and S3 shows selected bond lengths and angles of HL and  $\text{CuL}_2 \cdot \text{C}_4\text{H}_8\text{O}_2$ .

### 1. Crystal Structure of **HL**:

In the molecular structure of **HL**, the least-square plane calculation shows that the dihedral angle between the two benzene rings is 8.2, indicating that they are nearly coplanar. The sum of the three C-C-C bond angles is 359.9°, which take carbon atom(C5) as center (C6-C5-C7, 118.7(3)°; C6-C5-C4, 118.5(3)°; C4-C5-C7, 122.7(3)°). This result demonstrates that the carbon atom (C7) is practically coplanar with the benzene ring. Furthermore, it can be seen from Table 2 that all the bond lengths of C-C are located between the normal C=C double bond (1.32 Å) and C-C single bond (1.53 Å), which demonstrates that it is a  $\pi$ -electron highly delocalized system for **HL**.

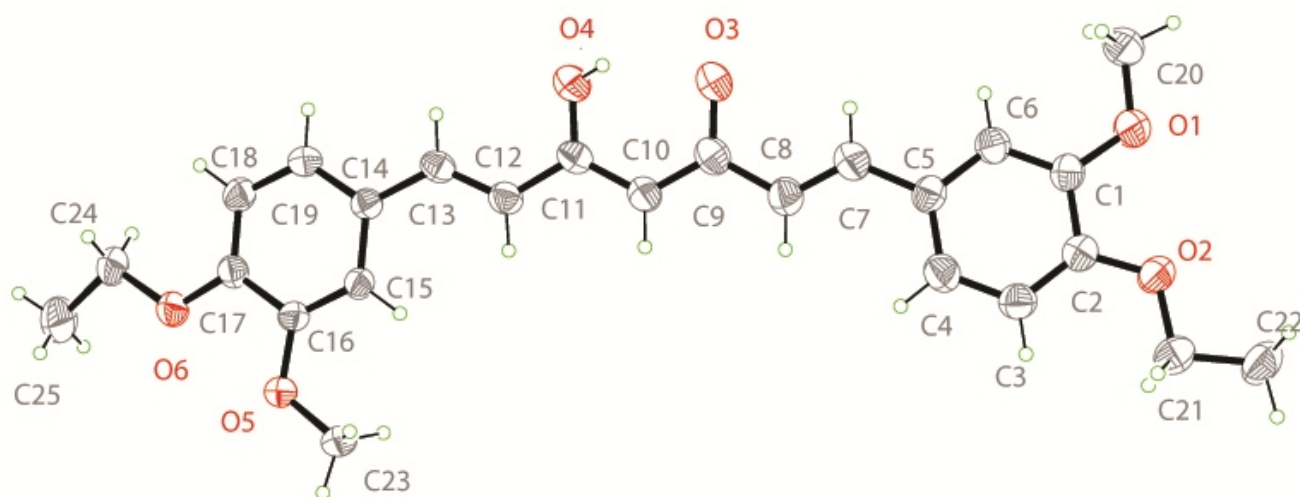

**Fig. S2.** The ORTEP structure of **HL** (50% thermal ellipsoid probability)

2. Crystal Structure of  $\text{CuL}_2 \cdot \text{C}_4\text{H}_8\text{O}_2$ : In Figure S3b, an infinite 1D columnar arrangement along *c*-axis has been found, which was stabilized by the two  $\pi$ - $\pi$  interactions with the short distances of 3.897 and 3.846 Å to form the 1D structure. The 1D columns are linked each other through the same  $\pi$ - $\pi$  stacking interactions to form a 3D framework(Figure S3c).

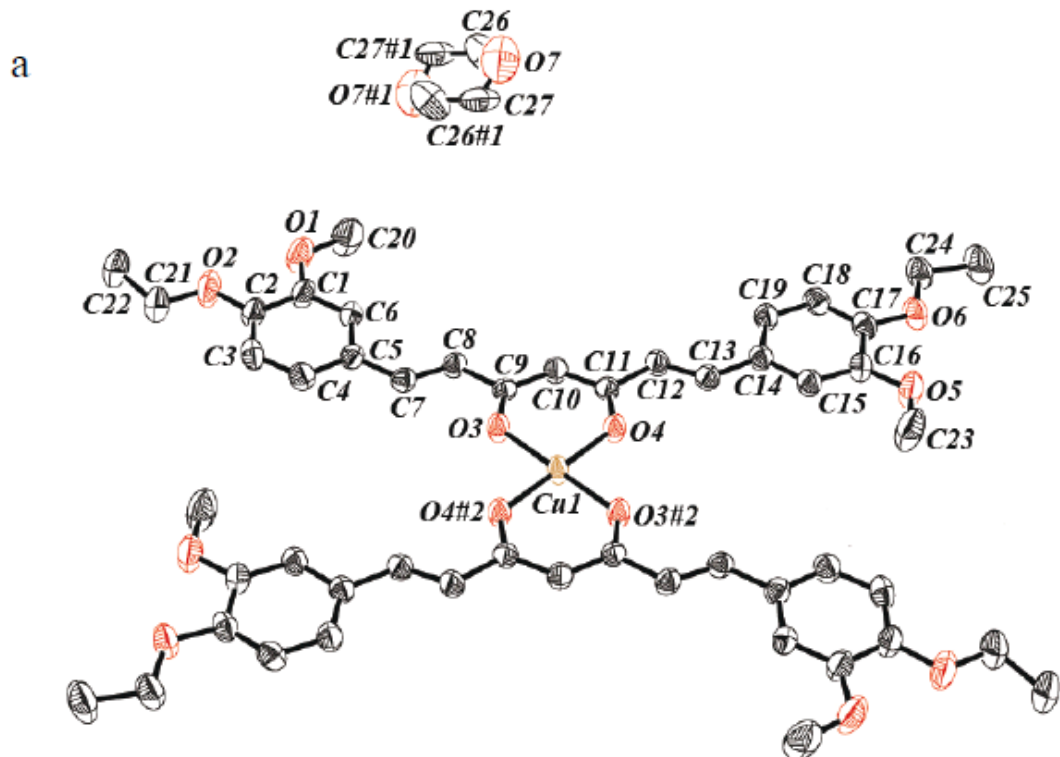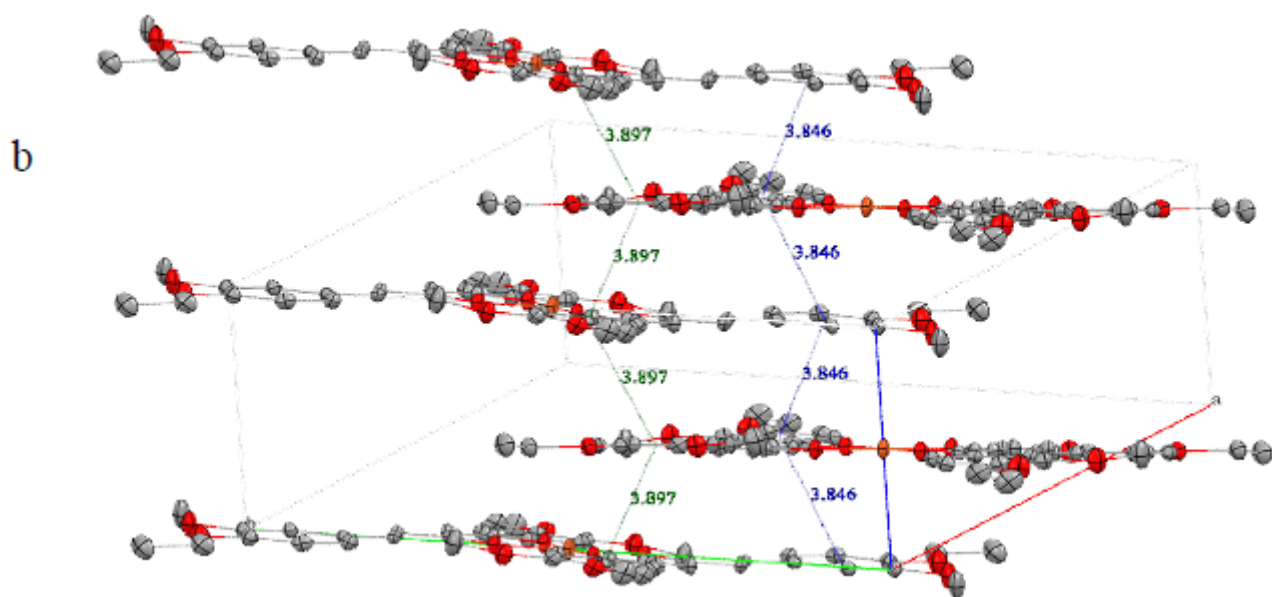

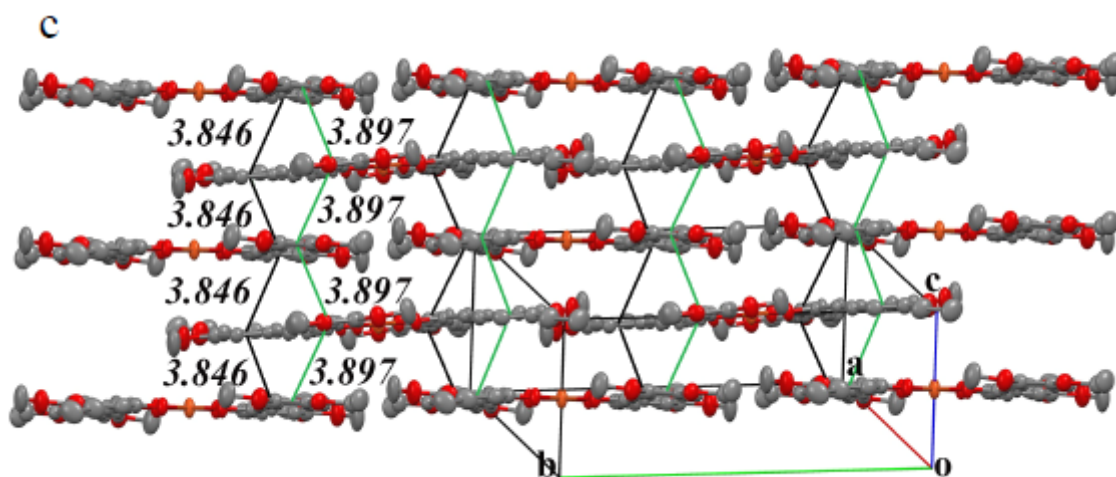

**Fig. S3.** (a) ORTEP structure of Cu(II) complex with atomic labeling scheme (with 50% thermal ellipsoid probability), all hydrogen atoms are omitted for clarity. (b) View showing the 1D columnar arrangement stabilized by  $\pi$ - $\pi$  interactions. (c) View showing the 3D supramolecular structure of the Cu(II) Complex.

**Table S1.** Crystal data and structure refinement parameters for **HL** and **CuL<sub>2</sub> · C<sub>4</sub>H<sub>8</sub>O<sub>2</sub>**

| Entry                            | HL                                             | CuL <sub>2</sub> · C <sub>4</sub> H <sub>8</sub> O <sub>2</sub> |
|----------------------------------|------------------------------------------------|-----------------------------------------------------------------|
| CCDC                             | 896630                                         | 991272                                                          |
| Formula                          | C <sub>25</sub> H <sub>28</sub> O <sub>6</sub> | C <sub>54</sub> H <sub>62</sub> CuO <sub>14</sub>               |
| Weight                           | 424.47                                         | 998.58                                                          |
| T[K]                             | 298(2)                                         | 296(2)                                                          |
| λ(Mo-Kα)[Å]                      | 0.71069                                        | 0.71069                                                         |
| Crystal system                   | Monoclinic                                     | Monoclinic                                                      |
| Space group                      | P2(1)/n                                        | P2(1)/c                                                         |
| a[Å]                             | 22.689(5)                                      | 21.86(2)                                                        |
| b[Å]                             | 4.913(5)                                       | 16.453(16)                                                      |
| c[Å]                             | 23.224(5)                                      | 7.184(7)                                                        |
| β[°]                             | 115.744(5)                                     | 97.643(11)                                                      |
| Volume[Å <sup>3</sup> ]          | 2332(2)                                        | 2561(4)                                                         |
| Z                                | 4                                              | 2                                                               |
| D(calc)[g/cm <sup>3</sup> ]      | 1.209                                          | 1.295                                                           |
| μ[mm <sup>-1</sup> ]             | 0.086                                          | 0.492                                                           |
| F(000)                           | 904                                            | 1054                                                            |
| Range(°)                         | 1.05-25.00                                     | 0.94-25.00                                                      |
|                                  | -26 ≤ h ≤ 26                                   | -25 ≤ h ≤ 25                                                    |
| Index range                      | -5 ≤ k ≤ 5                                     | -18 ≤ k ≤ 19                                                    |
|                                  | -27 ≤ l ≤ 27                                   | -8 ≤ l ≤ 8                                                      |
| Reflections/unique               | 15081/4099                                     | 17861/4510                                                      |
| R(int)                           | 0.0461                                         | 0.0247                                                          |
| Data/restraints/<br>parameters   | 40996 / 0 / 285                                | 4510 / 0 / 317                                                  |
| Final R indices<br>[I > 2σ(I)]   | R1 = 0.0484,<br>wR2 = 0.1134                   | R1 = 0.0503,<br>wR2 = 0.1420                                    |
| R indices (all data)             | R1 = 0.1144,<br>wR2 = 0.1582                   | R1 = 0.0629<br>wR2 = 0.1557                                     |
| GOF on F <sup>2</sup>            | 0.993                                          | 1.095                                                           |
| Completeness to theta =<br>25.00 | 100%                                           | 99.9%                                                           |

**Table S2.** Selected bond lengths [ $\text{\AA}$ ] and angles [ $^\circ$ ] for **HL**

| Bond Length |          |
|-------------|----------|
| C5—C7       | 1.471(4) |
| C7—C8       | 1.320(4) |
| C8—C9       | 1.475(4) |
| O3—C9       | 1.304(4) |
| C9—C10      | 1.386(4) |
| C10—C11     | 1.404(4) |
| O4—C11      | 1.301(3) |
| C11—C12     | 1.449(4) |
| C12—C13     | 1.338(4) |
| C13—C14     | 1.457(4) |
| Bond Angle  |          |
| C6—C5—C4    | 118.5(3) |
| C6—C5—C7    | 118.7(3) |
| C4—C5—C7    | 122.7(3) |
| C19—C14—C15 | 117.6(2) |
| C19—C14—C13 | 120.0(2) |
| C15—C14—C13 | 122.3(2) |

**Table S3.** Selected bond lengths [Å] and angles [°] for **CuL<sub>2</sub> · C<sub>4</sub>H<sub>8</sub>O<sub>2</sub>**

| Bond Length |            |
|-------------|------------|
| Cu1 O3      | 1.9031(18) |
| Cu1 O4      | 1.9282(18) |
| O3 C9       | 1.283(3)   |
| O4 C11      | 1.278(3)   |
| C5 C7       | 1.465(3)   |
| C7 C8       | 1.337(4)   |
| C9 C8       | 1.474(3)   |
| C10 C9      | 1.402(4)   |
| C11 C10     | 1.410(3)   |
| C11 C12     | 1.474(3)   |
| C12 C13     | 1.337(3)   |
| C14 C13     | 1.468(3)   |
| Bond Angle  |            |
| O3 Cu1 O4   | 93.57(8)   |
| C11 O4 Cu1  | 126.15(16) |
| C9 O3 Cu1   | 126.89(16) |
| C4 C5 C6    | 117.8(2)   |
| C4 C5 C7    | 123.6(2)   |
| C6 C5 C7    | 118.6(2)   |
| O4 C11 C10  | 124.2(2)   |
| O4 C11 C12  | 117.0(2)   |
| O3 C9 C10   | 124.1(2)   |
| O3 C9 C8    | 115.9(2)   |
| C10 C9 C8   | 120.0(2)   |
| C9 C10 C11  | 125.0(3)   |
| C15 C14 C13 | 122.4(2)   |
| C19 C14 C13 | 119.8(3)   |
| C19 C14 C15 | 117.8(2)   |



### Part 3

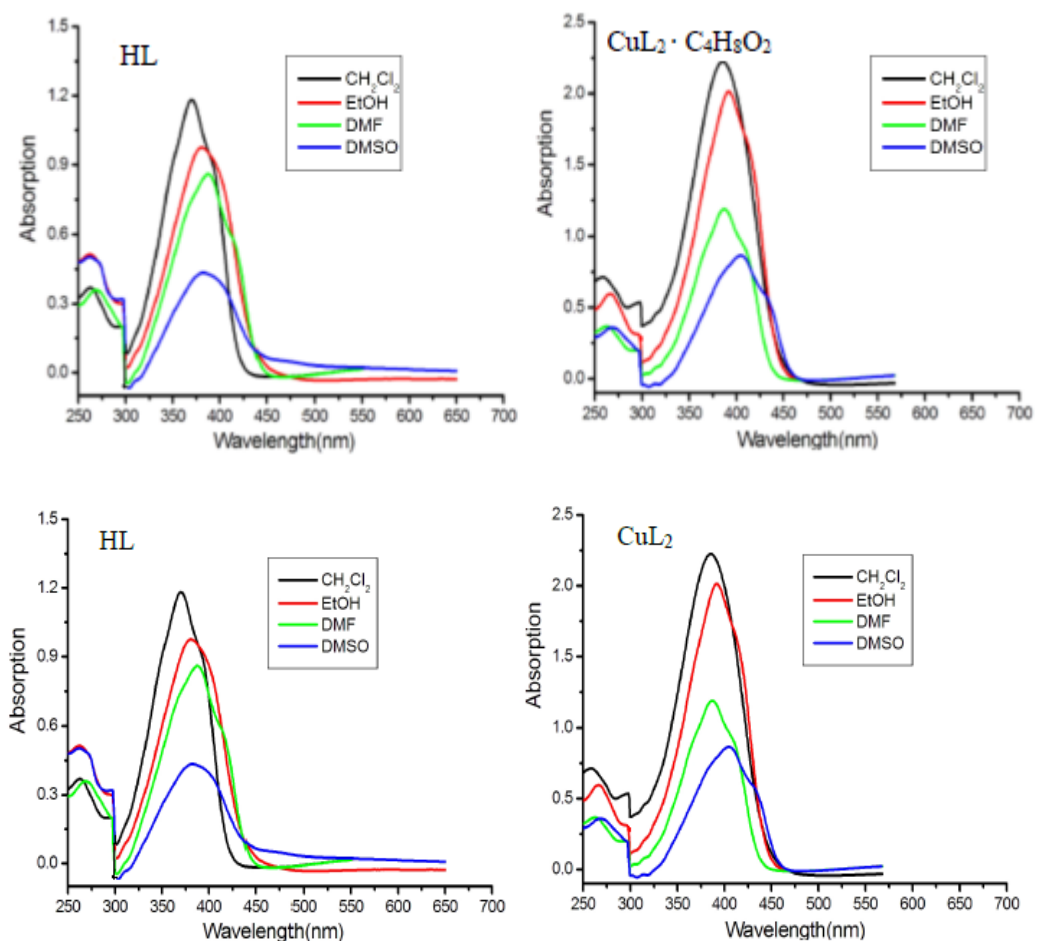

**Figure S4.** Linear absorption spectra of HL and CuL<sub>2</sub> in several solvents with differing Polarity

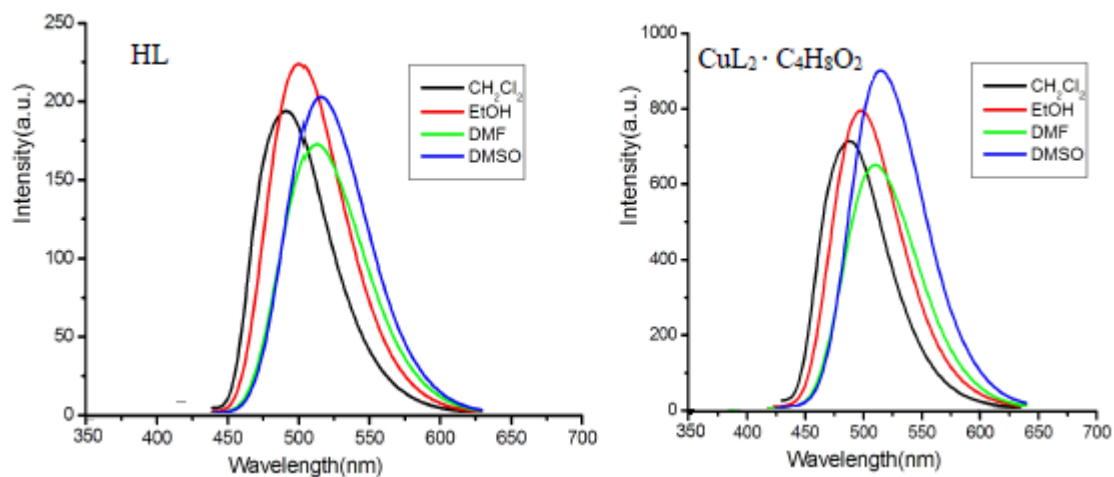

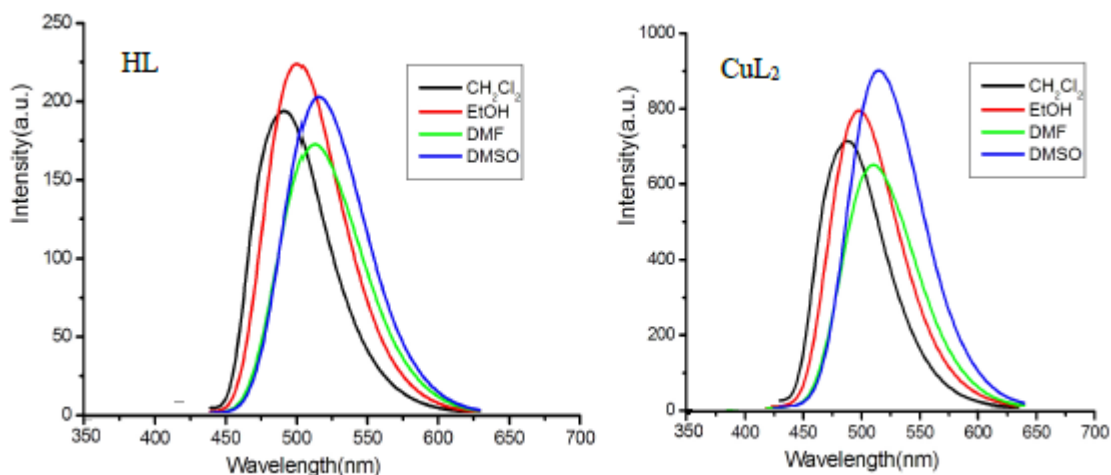

**Figure S5.** SPEF spectra of of HL and CuL<sub>2</sub> in several solvents with differing Polarity.

### TPA cross-section $\sigma$ :

The TPA cross-section  $\sigma$  was measured by comparing the TPEF intensity of the sample with that of a reference compound by the following Equations S1 and S2:

$$\Phi_s = \Phi_r \left( \frac{A_r(\lambda_r)}{A_s(\lambda_s)} \right) \left( \frac{I(\lambda_r)}{I(\lambda_s)} \right) \left( \frac{n_s^2}{n_r^2} \right) \frac{\int F_s}{\int F_r} \quad (\text{S1})$$

$$\sigma_s = \sigma_r F \Phi_r c_r n_r / F_r \Phi_s c n_s \quad (\text{S2})$$

Here,  $n$  is the refractive index,  $I(\lambda)$  is the relative intensity of the exciting light,  $A(\lambda)$  is the absorbance of the solution at the exciting wavelength  $\lambda$ ,  $\Phi$  is the quantum yield,  $c$  is the concentration of the solution in mol/L and  $F$  is the integrated area under the corrected emission spectrum, subscripts  $s$  and  $r$  denote the sample and reference solutions, respectively. The  $\sigma_r$  value of reference was taken from the RhB ethanol solution ( $\Phi_r = 0.69$ ,  $c = 1 \times 10^{-6}$  mol/L). The experimental errors are estimated to be  $\pm 10\%$  from sample concentrations and instruments.

### Cytotoxicity assay:

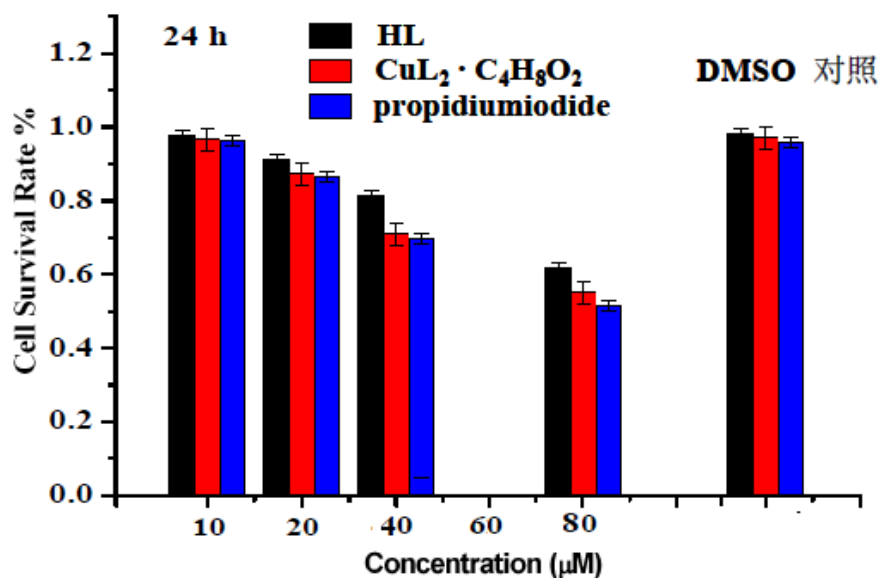

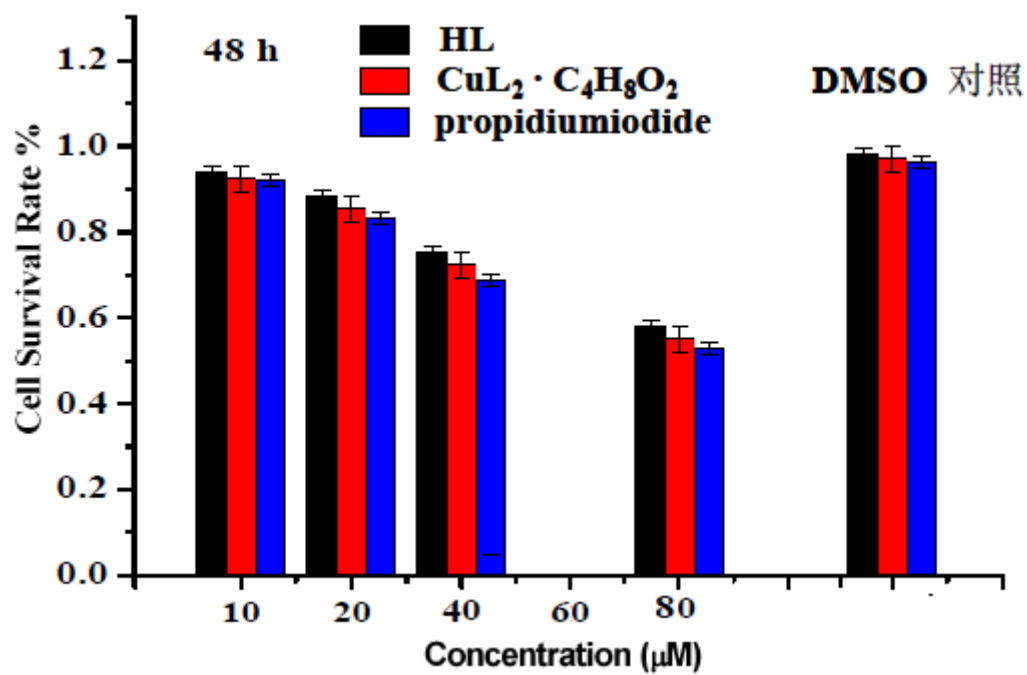

**Figure S6.** cytotoxicity data results of obtained compounds against MCF-7 cell line(24 h) from the MTT assay.
